# Supplementary figures and images for: Guanidinium/ammonium competition and proton transfer in the interaction of the amino acid arginine with the tetracarboxylic 18-crown-6 ionophore
Source: Royal Society of Chemistry journal article supplement (doi:10.1039/c7cp07975c), 2018-01-01

**1+A1**

$$\Delta E_{ZP} = 0$$

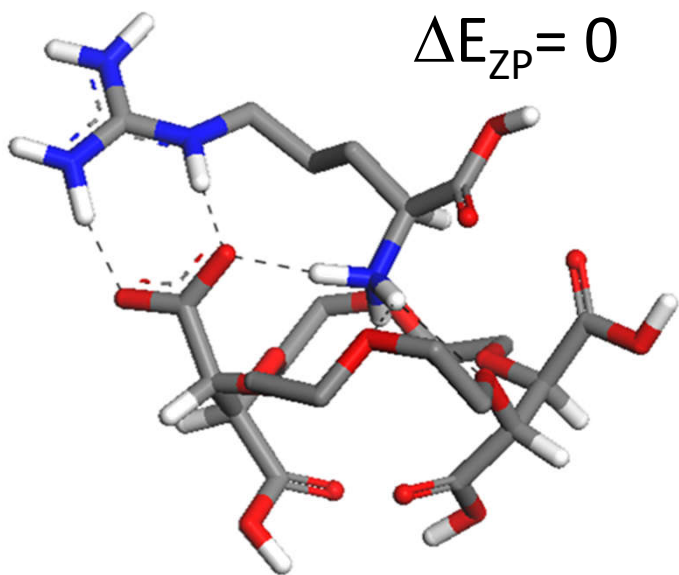**1+G3****+12**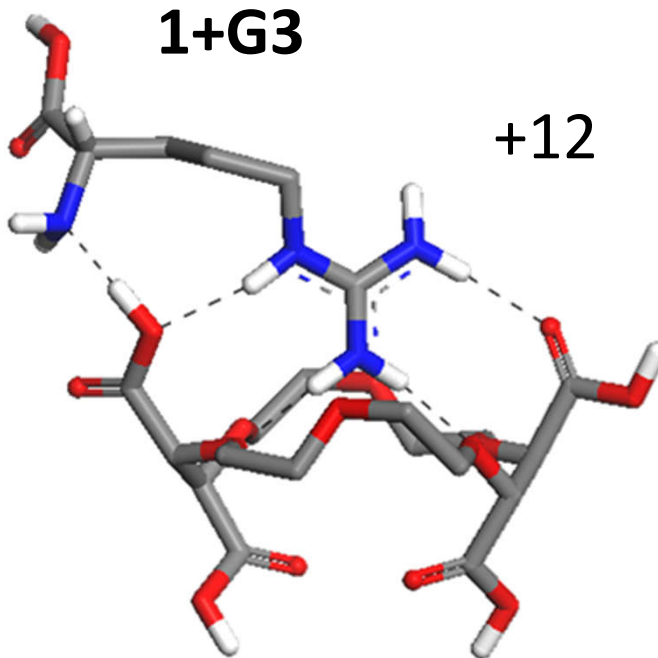**1+A2****+24**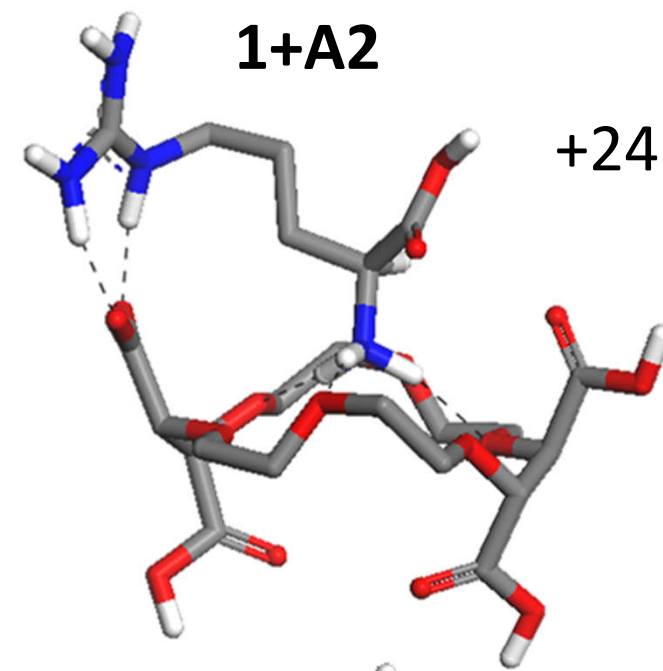**2+A1**

$$\Delta E_{ZP} = 0$$

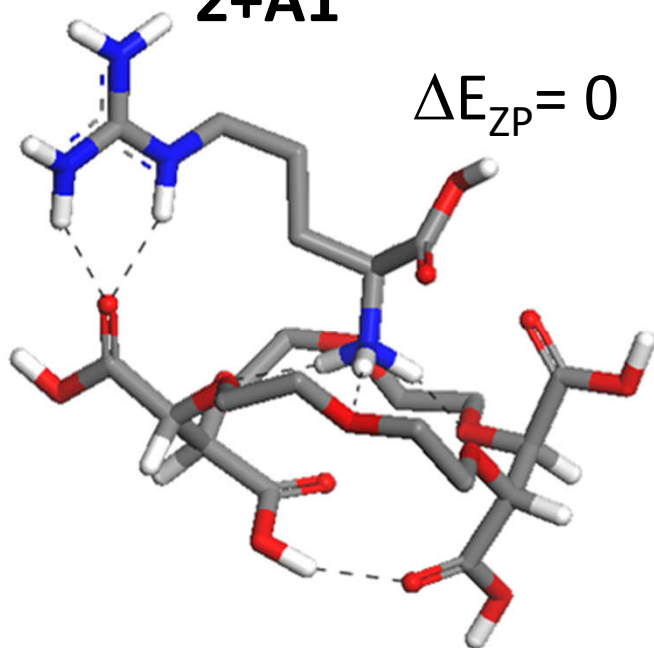**2+G2****+53**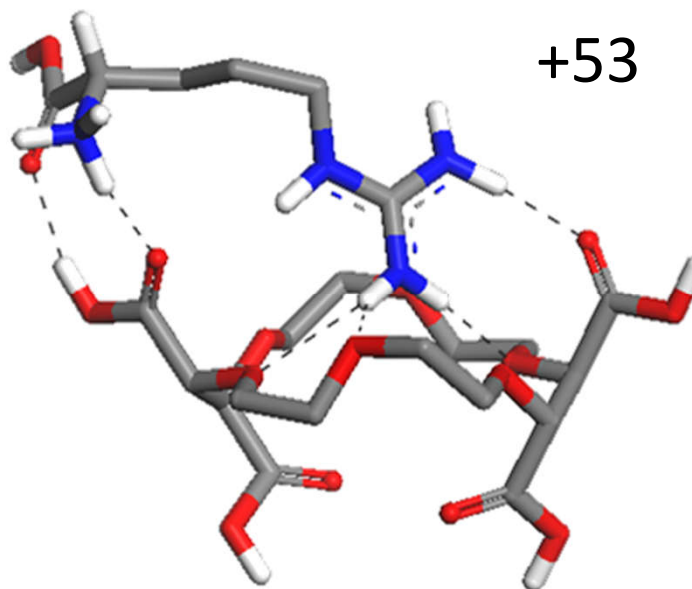**2+G3****+75**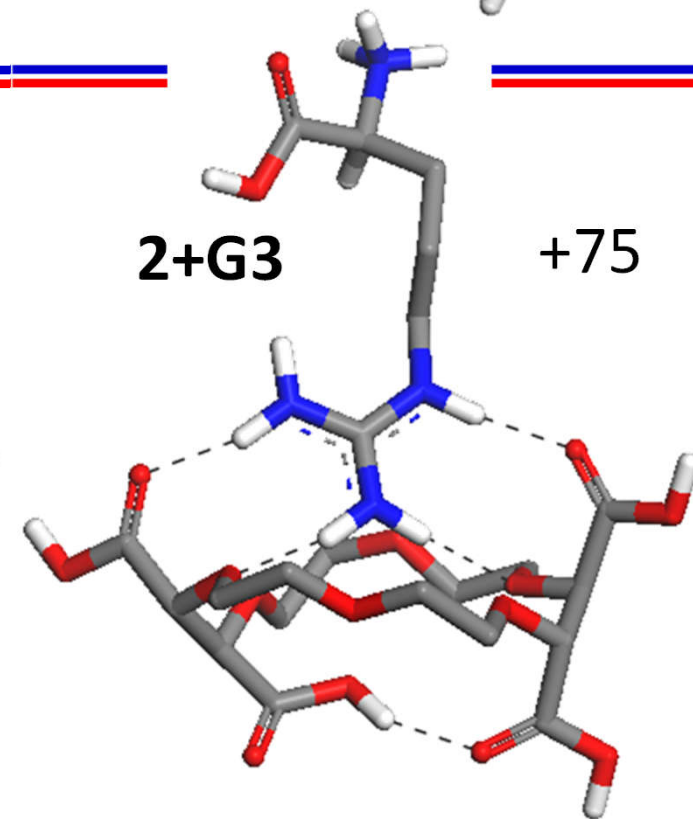

Supplement: c7cp07975c1.pdf [file c7cp07975c1.pdf]
